# Supplementary material
Source: PubMed Central journal article supplement (PMC4018922)
Supplement: AEM.03639-13_zam999105347so1.pdf [file AEM.03639-13_zam999105347so1.pdf]

**Supplementary material: Tables S1 and S2 with the p-values belonging to Table 1 and 2 in the original article**

Table S1: p values belonging to Table 1. Kruskal-Wallis tests are depicted in italics.

|                                             | culture pCO <sub>2</sub><br>(μatm) | culture DIC<br>(μmol kg <sup>-1</sup> ) | culture A <sub>T</sub><br>(μmol kg <sup>-1</sup> ) | culture pH |
|---------------------------------------------|------------------------------------|-----------------------------------------|----------------------------------------------------|------------|
| 0.32μ <sub>max</sub> × 0.97μ <sub>max</sub> | > <i>0.05</i>                      | 0.065                                   | 0.927                                              | 0.319      |
| 0.32μ <sub>max</sub> × P-replete            | > <i>0.05</i>                      | <0.001                                  | <0.001                                             | 0.003      |
| 0.97μ <sub>max</sub> × P-replete            | > <i>0.05</i>                      | <0.001                                  | <0.001                                             | 0.018      |
| 370μatm × 750μatm                           | < <i>0.001</i>                     | <0.001                                  | 0.923                                              | <0.001     |

Table S2: p values belonging to Table 2. Kruskal-Wallis tests are depicted in italics.

|                                                     | $0.32\mu_{\max} \times 0.97\mu_{\max}$ | $0.32\mu_{\max} \times \text{P-replete}$ | $0.97\mu_{\max} \times \text{P-replete}$ | $370\mu\text{atm} \times 750\mu\text{atm}$ |
|-----------------------------------------------------|----------------------------------------|------------------------------------------|------------------------------------------|--------------------------------------------|
| <i>M. pusilla</i> ( $\times 10^5 \text{ ml}^{-1}$ ) | <i>0.302</i>                           | *                                        | *                                        | <i>&lt;0.001</i>                           |
| FSC (r.u.)                                          | <0.001                                 | <0.001                                   | <0.001                                   | 0.317                                      |
| FL-4 (r.u.)                                         | <0.001                                 | 0.495                                    | <0.001                                   | 0.609                                      |
| Fv/Fm (r.u.)                                        | <0.001                                 | <0.001                                   | <0.001                                   | 0.437                                      |
| Chl <i>a</i> (fg cell <sup>-1</sup> )               | <i>0.754</i>                           | <i>&lt;0.001</i>                         | <i>&lt;0.001</i>                         | <i>0.767</i>                               |
| Epoxidation state                                   | <i>0.024</i>                           | <i>0.023</i>                             | <i>0.697</i>                             | <i>0.434</i>                               |
| Chl <i>a:b</i>                                      | 0.001                                  | 0.001                                    | 0.013                                    | 0.422                                      |
| NPP (pmol C cell <sup>-1</sup> h <sup>-1</sup> )    | 0.008                                  | <0.001                                   | <0.001                                   | 0.660                                      |
| APA (amol cell <sup>-1</sup> s <sup>-1</sup> )      | <0.001                                 | <0.001                                   | <0.001                                   | 0.066                                      |
| POC (fmol cell <sup>-1</sup> )                      | 0.003                                  | 0.214                                    | <0.001                                   | 0.272                                      |
| PON (fmol cell <sup>-1</sup> )                      | 0.150                                  | 0.003                                    | <0.001                                   | 0.589                                      |
| POP (fmol cell <sup>-1</sup> )                      | <i>&gt;0.05</i>                        | <i>&lt;0.05</i>                          | <i>&gt;0.05</i>                          | <i>&gt;0.05</i>                            |
| C:N                                                 | 0.304                                  | <0.001                                   | <0.001                                   | 0.002                                      |
| C:P                                                 | <0.001                                 | <0.001                                   | <0.001                                   | <0.001                                     |
| N:P                                                 | <i>&gt;0.05</i>                        | <i>&lt;0.05</i>                          | <i>&lt;0.05</i>                          | <i>0.123</i>                               |
